# Supplementary material
Source: publisher figshare collection journal article supplement (https://acs.figshare.com/ndownloader/files/22470473)
Supplement: Supplementary file 1 [file 22470473]

## Sheet: Screen Data
Plate #	Compound	Name	Fractional GFP Area, 5uM	% Infected, 5uM	Cell #, 5uM	Fractional GFP Area, 25uM	% Infected, 25uM	Cell #, 25uM	Red suggests toxicity, based on few cells
5025_A7_H11_5085_A2_H3	SAM001246822	Homoharringtonine	0.0784301	17.7319	5.35353	0.149664	10.4619	5.43626
5085_A11_H11_5145_A2_H7	SAM001246553	Triptolide	0.184831	18.4434	11.341	0.515683	30.7938	11.4843
4845_A9_H11_4905_A2_H5	SAM001247094	Rimcazole dihydrochloride	0.849403	15.2812	98.3066	0.0972634	1.1719	63.0058
4845_A2_H8	SAM002589997	Thiothixene	0.869465	10.1088	110.541	0.00315063	3.80609	7.28489
4845_A9_H11_4905_A2_H5	Rif )Avg)	Rifampicin (control)	1.05357	19.7407	108.249	1.65782	25.8454	125.473
4845_A9_H11_4905_A2_H5	SAM002564218	Loperamide hydrochloride	1.16268	6.18985	115.882	0.104864	1.90656	88.363
5085_A4_H10	SAM002264646	Rifampicin	1.27081	45.3963	113.583	1.8079	48.9309	85.3399
4845_A2_H8	SAM002589970	Rifabutin	1.3723	37.9559	95.4357	0.356849	9.78532	68.6127
4905_A6_H11_4965_A2_H2	Rif (Avg)	Rifampicin (control)	1.64773	25.1923	99.9239	1.67952	28.0943	100.233
4845_A2_H8	SAM002589953	Rifapentine	1.66116	39.5312	100.022	1.29053	29.7882	38.351
4845_A2_H8	SAM002703133	Tamoxifen	1.69873	7.71248	102.571	0.00857477	6.04847	6.38644
4845_A2_H8	Rif (Avg)	Rifampicin (control)	1.89861	31.316	104.864	2.72123	30.7571	105.005
4845_A2_H8	SAM002589965	Fluoxetine hydrochloride	2.06702	29.729	103.127	0.0688356	1.68353	87.3559
4965_A3_H9	Rif (Avg)	Rifampicin (control)	2.09724	32.5987	99.7962	1.6021	29.296	109.316
5145_A8_H11_5205_A2_H4	SAM001246666	Sertraline hydrochloride	2.18339	34.9746	109.998	0.00368059	5.96201	11.0686
5205_A5_C10	SAM001246989	Maprotiline hydrochloride	2.25933	27.8602	116.644	0.0432332	1.76705	100.441
4845_A2_H8	SAM002264601	Clomipramine hydrochloride	2.4536	26.8075	106.324	0.0877555	2.29656	97.5613
5205_A5_C10	Rif (Avg)	Rifampicin (control)	2.69561	33.2611	110.641	5.55237	40.5952	104.43
4785_A6_H11	SAM002554915	Nortriptyline hydrochloride	2.773	37.8457	99.6653	0.0752618	2.1914	86.2975
5145_A8_H11_5205_A2_H4	SAM001246981	Indatraline hydrochloride	2.86415	44.052	115.832	0.298374	3.23928	49.9608
4965_A3_H9	SAM001246774	Toremifene citrate	2.91034	12.6374	92.8871	0.0202822	10.2396	8.62376
5205_A5_C10	SAM001246523	Duloxetine hydrochloride	3.0705	35.8711	99.1457	0.127488	2.45299	82.1277
5085_A4_H10	SAM002564189	Amoxapine	3.67031	49.743	120.896	0.325849	6.93963	66.6857
4845_A2_H8	SAM001246856	Enrofloxacin	3.78761	39.2764	111.744	1.80978	27.7381	104.043
5025_A7_H11_5085_A2_H3	SAM002564240	Thioridazine hydrochloride	4.01784	16.2711	121.035	0.0500729	17.4358	7.24843
4965_A3_H9	SAM002589921	Demeclocycline	4.20429	46.9461	94.688	3.09943	51.0563	88.0712
4845_A2_H8	SAM002589992	Daunorubicin hydrochloride	4.25744	59.7268	8.52453	116.726	158.922	12.0346
4845_A9_H11_4905_A2_H5	SAM001247054	Prochlorperazine maleate	4.71224	28.9727	101.786	0.24833	3.47774	17.6109
5205_A5_C10	SAM001246991	Paroxetine maleate	4.83927	34.5966	105.669	0.0727258	3.09364	75.6261
4725_A2_H8	SAM001246736	Carvedilol	5.26819	27.5804	96.9904	0.0520983	5.58822	8.75606
4725_A2_H8	SAM002564196	Chlorpromazine hydrochloride	5.86362	40.0221	133.449	0.106876	1.90374	37.4242
5145_A8_H11_5205_A2_H4	SAM001247046	Trifluoperazine hydrochloride	6.13427	33.1979	83.5005	0.0941209	14.48	9.68501
4965_A3_H9	SAM002643511	Cefotaxime sodium	6.16876	39.4393	94.3971	3.65271	30.3498	98.4684
4965_A3_H9	SAM002589932	Doxycycline	6.25599	51.3669	103.309	2.64571	34.1725	97.7473
5085_A4_H10	Rif (Avg)	Rifampicin (control)	6.37049	53.726	106.523	6.17121	51.5733	84.2064
4905_A6_H11_4965_A2_H2	SAM001246705	Amlodipine	6.45865	35.1211	98.1653	0.225203	3.40742	49.5766
4845_A2_H8	SAM002264636	Promethazine hydrochloride	6.60853	41.478	125.735	0.0339512	0.819059	99.6794
4785_A6_H11	Rif (Avg)	Rifampicin (control)	6.84645	48.5455	99.1011	9.55835	48.9021	98.9085
4725_A9_H11_4785_A2_H5	SAM001246863	Fluphenazine dihydrochloride	7.01156	14.8626	87.591	0.00945516	5.21182	13.5625
5205_A5_C10	SAM001247052	Bifemelane hydrochloride	7.85372	49.4636	106.583	0.0242131	1.28414	93.7058
4905_A6_H11_4965_A2_H2	SAM002554919	Oxytetracycline hydrochloride	7.86709	53.5146	92.8787	2.59739	37.268	102.479
4845_A2_H8	SAM002264629	Ofloxacin	7.91598	56.0691	110.124	5.08791	42.0196	99.9028
4965_A3_H9	SAM001247040	Quinacrine hydrochloride hydrate	8.83445	39.7613	97.3579	0.111496	5.50742	20.1924
5085_A11_H11_5145_A2_H7	SAM001246846	Dactinomycin	10.0306	54.0346	13.1243	1.71199	44.6255	9.80517
4965_A3_H9	SAM002548971	Zidovudine	10.1063	56.2877	93.7005	6.52955	44.0696	98.4071
5025_A7_H11_5085_A2_H3	SAM002554907	Triclosan	10.1612	73.9673	122.952	6.83651	65.3548	38.4485
4785_A6_H11	SAM002264621	Minocycline hydrochloride	10.1636	59.9967	75.9713	4.36831	62.8945	82.3796
4965_A3_H9	SAM002264590	Ampicillin sodium	10.9786	47.2367	104.063	5.60488	41.3373	93.2401
4905_A6_H11_4965_A2_H2	SAM001246878	Clofazimine	10.9972	45.3868	92.7265	3.49604	26.5094	67.8915
4725_A2_H8	Rif (Avg)	Rifampicin (control)	11.0437	71.7775	103.158	9.5617	70.6468	105.745
4725_A9_H11_4785_A2_H5	SAM002699904	Clomifene citrate	11.2484	30.2251	74.2043	0.0624541	16.558	13.8748
5025_A7_H11_5085_A2_H3	SAM002264637	Perphenazine	11.2549	51.2634	134.955	0.481204	5.61299	44.159
4725_A2_H8	SAM002548963	Chloramphenicol	12.0706	84.6698	113.286	3.84764	54.1276	108.272
4965_A10_H11_5025_A2_H6	SAM001246676	Idarubicin hydrochloride	12.4944	48.8473	18.2425	11.0234	40.5091	14.2911
4965_A3_H9	SAM002264605	Desipramine hydrochloride	12.5295	52.4741	109.868	0.124639	3.15696	92.6992
4785_A6_H11	SAM001246727	Lomerizine dihydrochloride	12.6858	47.9604	83.5571	0.889421	24.9181	19.5447
4965_A3_H9	SAM001246633	N-Methylparoxetine	12.852	40.9862	101.16	0.0967149	2.17333	96.2743
4965_A10_H11_5025_A2_H6	Rif (Avg)	Rifampicin (control)	13.1316	61.1915	154.47	9.91329	57.9105	151.022
4725_A9_H11_4785_A2_H5	SAM002264649	Trimethoprim	13.5322	76.3003	145.449	10.3947	82.0855	92.9988
4725_A9_H11_4785_A2_H5	SAM001246755	Nimetazepam	13.9298	44.924	88.3431	130.421	105.093	111.685
4725_A2_H8	SAM001246728	Ormetoprim	14.322	85.3916	110.35	10.5254	82.8455	116.607
4725_A9_H11_4785_A2_H5	Rif (Avg)	Rifampicin (control)	14.3721	85.5802	117.798	12.5395	80.0798	125.779
4725_A2_H8	SAM001246739	Benproperine phosphate	15.0923	52.4307	103.89	0.796178	8.39722	93.5795
4725_A2_H8	SAM001247103	5-Nonyloxytryptamine hydrochloride	15.2624	45.7769	97.2371	0.493596	33.4057	18.901
5025_A7_H11_5085_A2_H3	Rif (Avg)	Rifampicin (control)	15.3478	63.8926	129.466	17.6622	71.0834	112.33
4965_A3_H9	SAM002264592	Amoxicillin	15.9577	64.9592	88.7943	9.76805	51.9565	92.097
4785_A6_H11	SAM001246883	Cyproheptadine hydrochloride	16.2104	50.66	100.669	0.0949712	2.71759	95.0338
4725_A2_H8	SAM001246726	Rufloxacin hydrochloride	16.9996	74.3537	115.294	21.5113	85.95	105.494
4785_A6_H11	SAM002548975	Raloxifene hydrochloride	17.3288	34.9572	66.8209	0.0192044	9.64146	6.66409
5205_A5_C10	SAM001246571	Pefloxacin mesylate	17.9431	71.6343	124.818	6.16602	49.2189	108.832
5085_A11_H11_5145_A2_H7	Rif (Avg)	Rifampicin (control)	19.2787	69.0692	118.512	20.8651	68.9918	136.47
4785_A6_H11	SAM001246758	Levofloxacin	19.3855	77.1961	117.154	6.11147	49.8002	108.756
4965_A10_H11_5025_A2_H6	SAM001246597	Rifaximin	19.8543	72.5081	164.403	2.43093	59.5181	106.758
4965_A3_H9	SAM001246628	Artesunate	20.6418	61.3838	102.466	9.45953	52.742	100.421
4725_A9_H11_4785_A2_H5	SAM001246816	Cefixime trihydrate	20.7994	74.556	101.979	15.9866	75.7653	83.1252
4965_A10_H11_5025_A2_H6	SAM001246818	Cefdinir	21.2504	60.4608	146.381	8.73277	51.3337	102.355
5145_A8_H11_5205_A2_H4	Rif (Avg)	Rifampicin (control)	21.9131	69.1152	111.517	15.6899	65.0348	120.564
4965_A10_H11_5025_A2_H6	SAM001246674	Cefpodoxime proxetil	23.2071	62.4609	168.759	5.73885	40.6807	153.034
4725_A9_H11_4785_A2_H5	SAM002589955	Gatifloxacin	23.4693	86.4994	121.283	19.1782	92.0732	96.25
4965_A10_H11_5025_A2_H6	SAM001246646	Amiodarone hydrochloride	24.129	73.4448	100.959	0.0177438	13.0518	7.57034
4965_A10_H11_5025_A2_H6	SAM001246545	Desloratadine	24.2649	66.6404	134.859	0.767156	8.05827	33.5263
4845_A9_H11_4905_A2_H5	SAM001247056	Clotrimazole	25.874	54.34	88.7036	2.7265	10.2503	8.86312
5205_A5_C10	SAM001246977	Fluvoxamine maleate	27.201	68.0185	114.329	0.0920875	3.28773	96.7191
5145_A8_H11_5205_A2_H4	SAM001246654	Moxifloxacin hydrochloride	29.1992	84.9533	118.808	9.77411	71.4429	152.115
4845_A2_H8	SAM002554902	Hydroxyzine pamoate	29.2537	67.1871	107.11	0.269267	3.85712	104.012
5085_A11_H11_5145_A2_H7	SAM001246686	Tosufloxacin tosilate	30.0827	91.1419	126.818	22.9555	74.9243	169.242
4965_A10_H11_5025_A2_H6	SAM001246742	Pazufloxacin	31.3831	88.2676	191.953	10.8782	71.6634	153.882
4845_A9_H11_4905_A2_H5	SAM001246748	Clarithromycin	32.9587	64.4813	100.061	3.54534	33.6108	123.313
4845_A9_H11_4905_A2_H5	SAM002564226	Oxybutynin hydrochloride	33.348	66.2517	96.0609	0.85956	11.7266	75.1445
4965_A3_H9	SAM002264615	5-Fluorouracil	36.8175	73.4135	116.951	16.1671	58.931	101.624
4905_A6_H11_4965_A2_H2	SAM002564228	Propafenone	37.2818	54.9918	101.162	0.0987359	3.03913	92.5337
4845_A9_H11_4905_A2_H5	SAM001246673	Didanosine	38.6	79.3193	104.187	18.5784	70.1104	101.156
4725_A2_H8	SAM001246645	Azelastine hydrochloride	38.8271	65.8533	114.607	0.482536	5.69989	92.3596
4845_A2_H8	SAM002699889	Propranolol hydrochloride	39.7775	79.7027	106.046	1.40358	21.574	96.7911
5205_A5_C10	SAM001246691	Tolterodine tartrate	42.451	77.5356	92.0738	2.51098	25.7206	112.023
4965_A3_H9	SAM002589947	Floxuridine	42.7583	78.7112	114.281	12.5896	54.3155	109.196
5205_A5_C10	SAM001246626	Atomoxetine hydrochloride	43.3285	61.9094	113.231	3.1259	35.7116	100.087
5145_A8_H11_5205_A2_H4	SAM001246979	Haloperidol hydrochloride	43.9498	71.3184	120.328	0.180286	8.64251	144.431
4845_A2_H8	SAM002589981	Doxazosin	44.8078	54.9052	116.562	0.00281902	6.35554	4.97425
5205_A5_C10	SAM001246775	Bifonazole	44.9038	83.0713	107.988	2.47887	18.1793	12.0531
4725_A2_H8	SAM001247061	Loxapine succinate	47.6438	85.0595	115.832	1.79329	19.9767	117.069
4725_A2_H8	SAM002548938	Benztropine mesylate	49.0782	83.5627	103.5	0.39079	5.26535	112.354
4905_A6_H11_4965_A2_H2	SAM001246750	Aripiprazole	49.2526	71.4077	108.068	0.228133	13.6004	4.43272
5205_A5_C10	SAM001246622	Imatinib mesylate	49.6721	69.0693	112.071	1.71728	20.1761	70.0144
4965_A3_H9	SAM002264595	5-Azacytidine	50.712	77.1015	59.9422	68.2115	100.627	24.0992
4845_A9_H11_4905_A2_H5	SAM001246554	Cerivastatin sodium	52.8731	80.3076	101.139	48.8869	67.7809	86.3584
4725_A2_H8	SAM001247028	Disulfiram	53.1617	78.2795	131.344	43.0332	88.4739	71.6887
4845_A2_H8	SAM001246724	Oxiconazole nitrate	53.2601	99.2579	62.0792	0.0287254	9.71608	5.80877
4845_A2_H8	SAM002264643	Piperacillin sodium	54.1314	91.8865	102.432	27.3507	64.875	107.574
4725_A2_H8	SAM001246876	6-Azauridine	54.8753	87.7365	118.818	70.2347	95.3059	97.9996
4725_A9_H11_4785_A2_H5	SAM001246975	Cisapride hydrate	55.8565	76.2784	114.064	0.211548	8.3192	30.7496
4845_A2_H8	SAM002264608	Doxepin hydrochloride	56.3794	93.9993	97.2425	0.515167	11.2216	102.471
4725_A9_H11_4785_A2_H5	SAM001247027	Diphenylcyclopropenone	56.8668	99.4211	108.047	0.355402	24.2556	14.3747
4965_A3_H9	SAM001246550	Gemcitabine hydrochloride	57.6399	77.3946	90.8268	47.8156	76.7589	75.0597
4905_A6_H11_4965_A2_H2	SAM001246679	Itraconazole	57.9476	86.3179	102.17	50.8804	89.1047	103.675
4965_A10_H11_5025_A2_H6	SAM001247096	Salmeterol	58.6639	90.8938	144.759	0.220072	5.49111	113.015
4785_A6_H11	SAM001246968	Verapamil hydrochloride	60.9488	91.8355	91.5153	8.65102	29.9262	101.586
5205_A5_C10	SAM001246974	Cinanserin	62.85	86.4854	100.364	2.06834	31.5239	90.6358
4725_A9_H11_4785_A2_H5	SAM002264652	Trihexyphenidyl hydrochloride	63.9684	92.9318	144.495	4.47333	32.3574	86.2489
4725_A2_H8	SAM002554890	Chlorpropamide	64.9771	91.0291	126.989	100.565	107.364	87.8965
5145_A8_H11_5205_A2_H4	SAM001247038	Pizotyline maleate	65.7837	89.4483	122.396	0.221017	4.81082	115.607
4845_A2_H8	SAM002589963	Lovastatin	66.0642	93.4828	105.026	62.189	80.5436	72.8181
5205_A5_C10	SAM001246672	Benidipine hydrochloride	66.1399	85.7942	114.083	39.3055	72.3639	38.8784
4905_A6_H11_4965_A2_H2	SAM001246766	Rolipram	66.4312	80.9206	108.709	85.8207	99.0025	101.137
4905_A6_H11_4965_A2_H2	SAM002564231	Procyclidine hydrochloride	66.4848	82.6238	99.9697	2.59153	23.2799	103.645
5205_A5_C10	SAM001247004	Naltrindole hydrochloride hydrate	66.663	77.7054	111.888	0.169246	6.25652	109.602
5205_A5_C10	SAM001247043	TFMPP hydrochloride	66.9659	81.4272	126.888	10.5582	53.4817	111.906
4725_A2_H8	SAM001246741	Lomifylline	67.3309	87.4841	122.732	117.787	105.285	114.586
5205_A5_C10	SAM001246803	Itavastatin calcium	68.0807	89.0665	96.4019	59.4886	81.3687	90.221
5085_A11_H11_5145_A2_H7	SAM001246600	Pioglitazone hydrochloride	68.0911	89.6456	73.3229	78.5128	91.3486	74.2772
4725_A2_H8	SAM002554937	Triamterene	68.5519	91.6623	108.541	80.6354	95.7477	100.695
5025_A7_H11_5085_A2_H3	SAM002548976	Clozapine	68.6595	92.0951	131.25	1.03496	20.0458	123.93
4785_A6_H11	SAM002589961	Azithromycin	68.6722	99.2671	98.977	9.31231	65.2474	84.3386
4725_A9_H11_4785_A2_H5	SAM001246815	Chlordiazepoxide	69.4529	101.691	101.88	41.3328	83.3066	156.062
4965_A3_H9	SAM001246609	Zeranol	70.3533	83.9277	100.028	74.6245	92.7718	85.6679
5025_A7_H11_5085_A2_H3	SAM002699901	(+/-)-Norepinephrine hydrochloride	70.3611	95.0984	106.222	81.2609	104.072	130.43
5025_A7_H11_5085_A2_H3	SAM002554886	Amitriptyline hydrochloride	70.5624	93.6012	111.308	1.90214	27.4926	101.831
4725_A9_H11_4785_A2_H5	SAM001246793	Atracurium besylate	70.9745	100.73	117.12	133.223	107.314	127.686
5025_A7_H11_5085_A2_H3	SAM002589939	Albendazole	71.0153	99.1728	77.6717	85.4199	110.906	79.4947
4725_A2_H8	SAM001246840	Prostaglandin E1	71.302	91.4232	107.611	92.3822	98.6388	117.574
4725_A2_H8	SAM002554931	Sulfacetamide	71.3053	91.6402	129.779	114.273	113.509	96.4412
5205_A5_C10	SAM001247039	Progesterone	71.814	87.1427	120.914	74.1766	99.1336	74.4456
4725_A2_H8	SAM002564208	Fluocinolone acetonide	72.0754	97.3418	108.345	108.924	103.905	105.494
4845_A9_H11_4905_A2_H5	SAM002564244	Phenoxybenzamine hydrochloride	72.3385	89.5819	92.0905	5.12446	18.4584	17.264
5085_A4_H10	SAM002699896	Mitoxantrone hydrochloride	72.4889	94.7814	47.86	0.517194	28.4234	6.73401
4845_A9_H11_4905_A2_H5	SAM006009019	Flecainide hydrochloride	72.668	83.9959	96.1828	45.5016	63.7127	105.972
4725_A9_H11_4785_A2_H5	SAM001246894	3-Pyridinemethanol	73.4226	91.9775	128.25	90.4188	98.0516	71.8754
4845_A2_H8	SAM002589954	Penicillin V	73.5918	95.6376	101.368	106.518	98.1881	101.925
4845_A2_H8	SAM002589944	Terbutaline sulfate	73.6744	89.6661	103.73	93.8612	91.6172	96.9836
4905_A6_H11_4965_A2_H2	SAM002589901	Cefuroxime	73.6745	90.2051	105.99	25.0499	56.7952	115.748
4725_A2_H8	SAM002564251	Cefoxitin sodium	73.8965	93.3784	112.162	104.013	102.403	101.366
5205_A5_C10	SAM001246695	Cetraxate hydrochloride	74.2294	85.7562	102.925	57.8594	78.1829	108.949
4725_A2_H8	SAM002564195	Bumetanide	74.2463	92.5458	109.813	103.038	95.9859	115.132
5205_A5_C10	SAM001246688	Perospirone hydrochloride	74.289	89.6398	107.926	45.178	71.1295	105.227
4725_A2_H8	SAM001247045	Trazodone hydrochloride	74.4485	86.377	132.618	97.8954	104.116	113.49
4725_A2_H8	SAM002554895	Chloroxine	74.5624	87.3999	117.837	10.7723	66.119	94.211
4725_A2_H8	SAM002554917	Nicotinic acid	74.6378	93.9784	123.269	119.877	112.886	98.5881
4725_A2_H8	SAM002589929	Primaquine diphosphate	74.7308	97.4503	102.375	17.3784	71.0625	107.176
4725_A2_H8	SAM002264647	trans-Retinoic acid	75.0036	86.0205	143.188	54.7063	83.7066	123.3
4845_A9_H11_4905_A2_H5	SAM001247019	Hexamethylenebisacetamide	75.0683	83.721	104.34	102.255	101.41	101.81
5025_A7_H11_5085_A2_H3	SAM002554889	Carisoprodol	75.1915	98.3833	115.189	100.353	109.841	101.753
4725_A9_H11_4785_A2_H5	SAM001247033	Famotidine	75.2147	101.756	127.149	123.257	109.263	73.8741
5205_A5_C10	SAM001246557	Dexchlorpheniramine maleate	75.3371	89.7936	107.988	28.3636	62.261	95.8931
4905_A6_H11_4965_A2_H2	SAM001246722	Megestrol acetate	75.5807	86.8535	92.787	19.514	53.3688	71.0114
4725_A2_H8	SAM001247053	Zardaverine	75.8123	90.1744	125.912	96.5008	103.895	125.068
5025_A7_H11_5085_A2_H3	SAM002264591	Acebutolol hydrochloride	76.0744	95.991	100.245	76.6408	103.14	98.5618
5025_A7_H11_5085_A2_H3	SAM002554904	Isoniazid	76.1338	96.8157	98.8182	95.2152	105.805	110.812
5025_A7_H11_5085_A2_H3	SAM002554920	Procaine hydrochloride	76.2208	97.4405	87.0404	93.6768	107.658	100.611
5085_A11_H11_5145_A2_H7	SAM001246867	2-Pyridylethylamine	76.4716	95.1072	92.44	85.1054	95.2939	96.5769
4725_A9_H11_4785_A2_H5	SAM001246629	Glycopyrronium bromide	76.8175	97.0661	111.807	127.621	119.452	73.4353
4725_A9_H11_4785_A2_H5	SAM001246772	Calcitriol	76.8581	108.007	101.73	63.0878	109.4	18.4374
4725_A2_H8	SAM001246869	Homoveratrylamine	76.9226	91.928	124.787	99.8905	106.905	118.668
4725_A9_H11_4785_A2_H5	SAM002264653	Ursodeoxycholic acid	77.0001	92.1592	128.702	93.3283	95.6073	106.187
4845_A2_H8	SAM002699897	Enalapril maleate	77.2131	94.3522	108.5	94.6328	95.8367	99.2616
5205_A5_C10	SAM001246994	Piribedil hydrochloride	77.5294	88.3812	123.354	85.5229	90.9873	118.464
5025_A7_H11_5085_A2_H3	SAM002564223	19-Norethindrone	77.561	99.7121	83.0681	101.934	109.209	98.9565
4845_A2_H8	SAM002589973	Acitretin	77.6763	100.74	108.778	66.5061	80.5458	55.5518
5025_A7_H11_5085_A2_H3	SAM002554883	Acetazolamide	77.7257	96.9012	98.1035	87.65	108.644	117.785
5025_A7_H11_5085_A2_H3	SAM002548945	Acetylcholine chloride	77.7394	97.624	112.737	78.9226	105.311	98.4838
4725_A9_H11_4785_A2_H5	SAM001246866	Mestranol	77.8454	93.9408	137.979	98.7442	88.8787	25.8121
5025_A7_H11_5085_A2_H3	SAM001246738	Zileuton	78.0825	97.2431	112.47	88.1393	107.979	91.1944
5025_A7_H11_5085_A2_H3	SAM002554905	Duvadilan	78.087	96.7415	91.8586	90.5904	107.722	112.743
4725_A2_H8	SAM002264606	Mexiletine hydrochloride	78.296	92.083	107.954	75.1601	92.9806	108.398
4845_A2_H8	SAM002264628	Orphenadrine hydrochloride	78.4342	95.4016	90.1098	6.82254	40.1628	106.771
4845_A9_H11_4905_A2_H5	SAM002264634	4-Phenylbutyric acid	78.737	87.6842	95.7211	108.033	105.111	88.4393
5025_A7_H11_5085_A2_H3	SAM002554881	Symmetrel	78.8464	97.624	99.1742	109.857	111.051	120.621
4845_A2_H8	SAM002264627	Nadolol	78.9395	95.0276	115.961	94.7958	97.8217	105.263
4725_A9_H11_4785_A2_H5	SAM001247012	Cytarabine	79.1371	84.0394	119.075	85.5345	95.251	58.0605
5085_A11_H11_5145_A2_H7	SAM001246580	Penciclovir	79.1387	93.7353	104.71	110.029	100.703	115.58
4845_A9_H11_4905_A2_H5	SAM002564235	Tropicamide	79.1985	86.0573	102.031	97.5906	107.681	78.9988
5025_A7_H11_5085_A2_H3	SAM002589990	Dicloxacillin sodium	79.2809	100.616	73.0302	108.661	111.213	104.156
4845_A2_H8	SAM002548983	Cyclophosphamide hydrate	79.3055	98.2483	99.2828	103.844	97.5047	97.3688
5085_A11_H11_5145_A2_H7	SAM001247081	AM-251	79.4988	97.194	84.5955	90.1609	94.5281	73.4068
4785_A6_H11	SAM002564220	Medroxyprogesterone 17-acetate	79.5592	100.246	114.897	34.8464	55.7745	46.3694
4725_A2_H8	SAM001247024	Diphenhydramine hydrochloride	79.5684	91.1442	106.827	73.1082	94.6557	123.341
5205_A5_C10	SAM001246667	Efavirenz	79.6036	91.2959	122.257	8.16935	23.1276	11.4033
4905_A6_H11_4965_A2_H2	SAM001246652	Olanzapine	79.6384	96.2412	96.3023	6.5881	31.137	103.207
4725_A2_H8	SAM001246855	Phenothiazine	79.7754	95.3512	99.633	110.997	103.374	108.86
5205_A5_C10	SAM001246533	Esmolol hydrochloride	79.954	90.5847	117.193	78.0179	87.0199	108.538
5085_A11_H11_5145_A2_H7	SAM001246707	Ampiroxicam	80.0483	93.2891	93.5827	89.8815	96.0915	89.1222
5025_A7_H11_5085_A2_H3	SAM001246753	Flucytosine	80.1455	98.6033	98.6389	99.0637	111.352	102.029
5025_A7_H11_5085_A2_H3	SAM002564216	Imipramine hydrochloride	80.2278	97.2682	136.293	2.47434	29.7234	129.288
4725_A2_H8	SAM002699903	Amcinonide	80.284	91.4166	111.378	83.8818	93.5861	91.8948
4725_A2_H8	SAM002589951	Ribavirin	80.2856	89.4415	103.697	46.13	103.902	72.9112
4725_A2_H8	SAM001246779	Zalcitabine	80.3385	100.262	103.156	104.272	111.685	87.8965
4725_A9_H11_4785_A2_H5	SAM001246725	Sotalol hydrochloride	80.3476	102.163	112.608	124.623	112.824	89.6239
5205_A5_C10	SAM001247068	SKF 83566 hydrobromide	80.4114	93.02	117.742	32.9731	65.2457	117.401
4725_A2_H8	SAM001246737	Tranilast	80.5824	88.9565	104.381	105.663	108.28	95.5572
4845_A2_H8	SAM002548982	Eszopiclone	80.6141	93.4711	102.063	81.5589	84.9856	101.187
5025_A7_H11_5085_A2_H3	SAM002554922	Propantheline bromide	80.7493	97.8855	95.0707	116.184	110.983	114.712
4845_A9_H11_4905_A2_H5	SAM001246706	Pemolide	80.8145	90.0568	100.923	115.603	107.625	89.7873
4725_A2_H8	SAM001247042	Stiripentol	80.8857	89.8909	127.773	99.5049	106.086	124.689
4725_A2_H8	SAM002699895	Beclomethasone dipropionate	80.8873	93.4359	114.804	103.569	107.513	106.292
5025_A7_H11_5085_A2_H3	SAM002589958	Ondansetron	81.1564	98.0942	90.6541	69.7812	101.455	96.7891
4725_A2_H8	SAM001246562	Methylandrostenediol	81.1649	97.7382	103.89	121.983	130.533	104.145
4845_A9_H11_4905_A2_H5	SAM002564233	Spectinomycin	81.4149	92.5426	101.169	102.613	108.282	92.2543
5205_A5_C10	SAM001247003	Pancuronium dibromide	81.4687	89.4041	107.681	79.973	92.8425	107.12
4725_A9_H11_4785_A2_H5	SAM001246649	Letrozole	81.5243	101.428	112.659	110.933	96.1658	169.059
4845_A2_H8	SAM002548966	Dilantin	81.6798	96.9839	99.1438	89.6897	88.1261	101.636
4725_A9_H11_4785_A2_H5	SAM001246970	Zucapsaicin	81.7407	99.7888	108.348	114.582	104.941	65.3129
5205_A5_C10	SAM001246556	Dexbrompheniramine maleate	81.7504	92.4486	117.683	23.402	57.9422	127.976
4725_A9_H11_4785_A2_H5	SAM001246904	Estrone 3-sulfate sodium salt	81.8692	97.2544	140.735	92.7404	84.9695	123.748
4905_A6_H11_4965_A2_H2	SAM001246590	Stanozolol	81.944	95.9932	95.3231	17.683	51.0382	29.0464
5025_A7_H11_5085_A2_H3	SAM001246875	Mepivacaine hydrochloride	81.9797	98.3431	107.919	88.7321	107.509	103.88
4725_A9_H11_4785_A2_H5	SAM001246847	Tramadol hydrochloride	81.9977	104.825	105.138	157.873	121.182	77.7478
5205_A5_C10	SAM001246627	Donepezil hydrochloride	82.0735	91.8593	109.755	81.6776	86.1282	103.455
5205_A5_C10	SAM001246776	Hyperoside	82.1937	87.2166	105.793	81.2733	98.2314	101.565
4905_A6_H11_4965_A2_H2	SAM001246568	Vindesine sulfate	82.2834	99.3997	84.504	54.1875	86.9635	78.3605
5205_A5_C10	SAM001246524	Ropivacaine hydrochloride	82.3058	91.1581	100.913	86.9103	102.342	112.438
4965_A10_H11_5025_A2_H6	SAM001246718	Irsogladine maleate	82.3829	97.9097	103.029	92.0891	99.3432	82.8876
4725_A9_H11_4785_A2_H5	SAM006031219	Oligomycin A	82.7889	73.8534	7.47037	2.80034	37.5524	9.56238
5205_A5_C10	SAM001246971	Salbutamol sulfate	82.8753	92.8841	119.754	79.981	86.4831	120.116
4965_A10_H11_5025_A2_H6	SAM001246861	Nialamide	82.9138	99.1881	107.385	90.9145	99.5124	117.961
4785_A6_H11	SAM001246644	Mevastatin	82.9882	96.4382	74.4669	64.8571	79.4854	61.0967
5025_A7_H11_5085_A2_H3	SAM001246714	Ipriflavone	83.0318	100.181	103.235	111.014	110.922	108.647
5205_A5_C10	SAM001246914	1,1-Dimethyl-4-phenylpiperazinium iodide	83.0722	89.3082	105.548	83.8104	93.1012	112.672
4845_A2_H8	SAM002554923	Probenecid	83.0807	89.1005	105.907	80.956	88.9578	95.7956
5085_A11_H11_5145_A2_H7	SAM001246659	Mirtazapine	83.2461	98.1653	102.925	76.1522	99.3923	88.7837
5145_A8_H11_5205_A2_H4	SAM001246559	Epirubicin hydrochloride	83.2953	90.5789	46.2461	1.5788	30.2983	11.2222
4725_A9_H11_4785_A2_H5	SAM002264596	Flumadine hydrochloride	83.3367	94.1924	141.186	92.3373	101.013	65.6242
4965_A10_H11_5025_A2_H6	SAM001246662	Nobiletin	83.485	97.5417	64.1083	80.2097	99.1633	49.2839
4725_A9_H11_4785_A2_H5	SAM006031220	Goserelin acetate	83.5125	94.9059	129.806	130.747	116.968	93.1226
4845_A9_H11_4905_A2_H5	SAM001247031	Epigallocatechin gallate	83.6877	86.4958	105.509	108.814	101.578	105.625
4725_A9_H11_4785_A2_H5	SAM001246964	3'-Deoxydenosine	83.8913	105.829	97.6686	58.2387	82.5189	119.935
5085_A11_H11_5145_A2_H7	SAM001246783	Ritonavir	83.9283	98.365	71.9706	67.738	103.434	52.856
5205_A5_C10	SAM001247049	L-NMMA acetate	84.1648	92.8761	100.73	80.7104	92.4053	93.2343
5025_A7_H11_5085_A2_H3	SAM002548978	Podofilox	84.3126	103.003	71.4242	111.456	112.229	62.517
5145_A8_H11_5205_A2_H4	SAM001246563	Indirubin	84.553	93.505	74.2644	74.4707	97.5643	90.0106
4845_A9_H11_4905_A2_H5	SAM001246804	Balsalazide	84.5724	95.8348	115.512	111.26	109.848	90.7121
4725_A2_H8	SAM001246703	Levosulpiride	84.7108	98.925	115.048	96.2986	106.91	102.167
4965_A3_H9	SAM001246639	Amisulpride	84.7219	96.1694	104.73	101.227	102.274	102.283
4965_A10_H11_5025_A2_H6	SAM001246752	Nizatidine	84.7482	97.3804	86.1144	86.1235	98.8616	114.331
5205_A5_C10	SAM001247013	Droperidol	84.8495	95.9486	126.219	55.748	78.5501	107.414
4965_A10_H11_5025_A2_H6	SAM001246656	Pravastatin sodium	84.8983	97.0231	107.606	103.283	100.497	116.107
5205_A5_C10	SAM001246749	Valaciclovir hydrochloride	84.9777	93.2857	110.304	84.1988	96.3919	114.621
4845_A2_H8	SAM002297829	Metyrapone	85.2833	99.4286	91.8221	99.8067	98.64	93.2596
4725_A9_H11_4785_A2_H5	SAM001246881	RU-486	85.3047	108.298	99.272	122.497	129.09	57.7493
4725_A9_H11_4785_A2_H5	SAM001246997	Riluzole hydrochloride	85.3182	96.9129	139.582	92.9199	93.8007	85.7502
5085_A4_H10	SAM002564203	Danazol	85.3391	99.0458	102.949	0.140404	22.8356	9.35638
4845_A9_H11_4905_A2_H5	SAM001246777	Quetiapine fumarate	85.3522	86.9627	97.8153	14.7107	47.7628	102.966
4725_A2_H8	SAM001247107	Clobenpropit	85.3975	95.5793	110.156	121.773	107.464	115.47
4845_A9_H11_4905_A2_H5	SAM001246579	Sumatriptan succinate	85.4414	97.4233	91.1671	114.693	105.597	102.851
4725_A9_H11_4785_A2_H5	SAM002554934	Tetracycline	85.6969	91.6274	125.745	100.731	98.3767	82.1877
4965_A3_H9	SAM002548937	Mesna	85.7056	96.1877	89.0276	101.562	108.097	96.2437
5085_A4_H10	SAM002548933	Molindone hydrochloride	85.7357	97.8708	119.067	100.804	100.514	67.3401
4965_A10_H11_5025_A2_H6	SAM001246871	Maltol	85.7514	97.5823	122.305	100.786	100.075	107.764
4845_A9_H11_4905_A2_H5	SAM001246618	Bisoprolol fumarate	85.8059	98.65	88.6427	98.1741	97.8921	107.36
5025_A7_H11_5085_A2_H3	SAM002554921	Pyrimethamine	85.9044	99.6807	92.394	62.4606	100.466	110.065
4845_A9_H11_4905_A2_H5	SAM001246552	Cilastatin sodium	85.9661	91.2087	103.633	105.093	95.7712	97.9191
4965_A10_H11_5025_A2_H6	SAM001246697	Lamotrigine	85.9711	99.8046	125.11	85.7455	97.4285	150.637
4965_A3_H9	SAM001246555	Ethylestrenol	85.9908	100.069	101.132	77.0046	92.2936	100.872
5025_A7_H11_5085_A2_H3	SAM002548942	Meclofenamic acid sodium salt	86.0051	95.9721	91.3661	101.364	109.718	108.843
4905_A6_H11_4965_A2_H2	SAM001246578	Saquinavir mesylate	86.0448	103.072	97.4942	20.5212	37.8555	71.741
5085_A11_H11_5145_A2_H7	SAM001247016	Procysteine	86.3017	97.565	94.0791	132.906	105.478	118.47
5085_A11_H11_5145_A2_H7	SAM001246908	7-Nitroindazole	86.3823	93.6897	112.482	88.1597	99.0137	91.0684
4845_A9_H11_4905_A2_H5	SAM002564254	Nicardipine hydrochloride	86.4491	101.057	81.3481	5.82188	21.9285	104.548
4965_A10_H11_5025_A2_H6	SAM001246898	Beclomethasone	86.4617	100.136	90.8426	100.863	99.4154	117.187
4725_A2_H8	SAM002589979	Mupirocin	86.503	96.8126	122.341	25.1095	88.4243	116.564
4725_A9_H11_4785_A2_H5	SAM002554887	Busulfan	86.5828	98.0466	137.227	81.8823	92.5191	88.8739
4725_A9_H11_4785_A2_H5	SAM001246546	Repaglinide	86.5896	99.8895	108.95	23.7633	52.3412	19.0621
4965_A10_H11_5025_A2_H6	SAM001246821	Vecuronium bromide	86.6521	99.0448	108.714	97.4878	99.3278	118.192
5025_A7_H11_5085_A2_H3	SAM002554930	Sulfamethoxazole	86.6592	98.5744	106.757	96.0104	110.45	110.025
4725_A2_H8	SAM002554932	Sulfinpyrazone	86.8656	89.1115	127.773	108.854	106.315	94.9687
5025_A7_H11_5085_A2_H3	SAM002554884	Allopurinol	86.9291	98.9063	99.7551	83.9755	105.925	113.807
4845_A9_H11_4905_A2_H5	SAM002564230	Valproic acid	86.9592	92.8094	96.0905	99.2512	103.097	97.5723
4725_A2_H8	SAM002548936	Ganciclovir	87.0983	96.9632	105.946	111.787	104.352	119.595
5025_A7_H11_5085_A2_H3	SAM002589983	Chlorthalidone	87.112	98.411	99.1742	78.3439	92.1773	70.5532
4725_A2_H8	SAM001246567	Torasemide	87.1785	97.964	112.308	111.25	105.439	116.142
5025_A7_H11_5085_A2_H3	SAM003107541	Phentolamine mono-hydrochloride	87.1807	100.141	89.4924	89.0379	110.071	114.989
4965_A3_H9	SAM002564224	Nicotine	87.241	101.004	86.2114	77.8249	94.2843	102.795
5085_A11_H11_5145_A2_H7	SAM001246606	Tegaserod maleate	87.2729	95.933	65.5511	0.0092796	6.25911	8.66359
4845_A9_H11_4905_A2_H5	SAM002589956	Clopidogrel	87.2966	92.2516	97.2613	42.5614	68.307	79.5769
4845_A9_H11_4905_A2_H5	SAM002564242	Eryped	87.3869	85.9198	104.524	8.30204	34.3085	87.822
5145_A8_H11_5205_A2_H4	SAM001247032	Beta-estradiol	87.5693	100.484	76.5105	93.9384	96.7221	154.038
5025_A7_H11_5085_A2_H3	SAM002264625	Norfloxacin	87.7387	102.187	148.338	29.9577	89.9288	118.811
4905_A6_H11_4965_A2_H2	SAM001247070	Pergolide mesylate	87.8164	97.4638	96.7607	10.8754	33.5707	101.05
4845_A2_H8	SAM002589971	Felodipine	87.8551	118.617	69.6317	49.555	87.5843	68.3566
4845_A9_H11_4905_A2_H5	SAM002564225	Nabumetone	87.9139	94.5413	106.432	138.978	109.746	98.2659
4725_A2_H8	SAM001246657	Montelukast sodium	88.1524	95.7365	95.1817	10.7186	46.3377	10.4397
5085_A4_H10	SAM002564204	(+)-cis-Diltiazem hydrochloride	88.1785	96.1754	124.635	89.3476	92.0636	76.6975
4845_A2_H8	SAM002264618	Cortisol 21-acetate	88.3231	104.217	80.1473	98.4566	98.5972	100.673
5025_A7_H11_5085_A2_H3	SAM002554926	Propylthiouracil	88.3654	99.5499	92.394	97.7182	109.283	127.674
5145_A8_H11_5205_A2_H4	SAM001247034	Fluperlapine	88.4264	100.578	106.108	3.70066	49.5311	122.986
5145_A8_H11_5205_A2_H4	SAM001246534	Ranolazine dihydrochloride	88.4338	99.7555	75.5406	90.6199	99.4845	89.162
5085_A11_H11_5145_A2_H7	SAM001246594	Loxoprofen sodium	88.4857	97.4343	105.138	110.483	99.5344	117.329
4725_A9_H11_4785_A2_H5	SAM001247051	Mesoridazine besylate	88.6725	103.201	108.748	0.931347	14.9115	58.3118
4785_A6_H11	SAM001246570	Vincristine sulfate	88.7183	104.808	63.0599	48.5143	84.1257	61.379
5085_A11_H11_5145_A2_H7	SAM001247062	Dextromethorphan hydrobromide, monohydrate	88.8647	97.2236	101.286	99.8927	98.7846	108.666
4725_A2_H8	SAM001246536	Diazepam	88.9194	95.7011	129.045	98.401	103.051	121.28
4845_A9_H11_4905_A2_H5	SAM002264617	Hydrocortisone	89.0559	100.521	86.8569	122.957	124.74	56.4162
4725_A9_H11_4785_A2_H5	SAM002564210	Glipizide	89.1729	94.2909	141.589	109.664	102.961	94.7501
4725_A9_H11_4785_A2_H5	SAM001247071	Ebselen	89.2744	106.033	103.935	108.472	113.028	91.7501
4725_A9_H11_4785_A2_H5	SAM002564205	Digoxin	89.2744	108.362	107.042	166.732	93.9069	59.9993
4845_A9_H11_4905_A2_H5	SAM001246973	CGS 15943	89.338	91.2391	99.108	78.0138	90.8244	105.163
4725_A2_H8	SAM001246694	Levonorgestrel	89.4087	98.9981	113.973	62.2504	80.9247	77.6243
4725_A9_H11_4785_A2_H5	SAM001247007	(-)-Cotinine	89.4096	100.076	119.027	102.511	107.583	88.6226
5085_A4_H10	SAM002564200	Cefazolin sodium	89.4392	97.122	103.612	102.091	103.073	90.2242
5085_A4_H10	SAM001246765	Oxymetholone	89.529	97.0478	105.028	103.828	101.845	75.8036
5085_A11_H11_5145_A2_H7	SAM001247083	Dihydrexidine hydrochloride	89.6795	100.529	105.848	115.114	106.587	130.155
4965_A3_H9	SAM001246634	Olmesartan medoxomil	89.6841	103.291	103.541	95.2734	101.51	101.742
5025_A7_H11_5085_A2_H3	SAM002703134	Hydroflumethiazide	89.7011	100.112	97.3888	84.7377	104.174	99.8215
4965_A3_H9	SAM001246909	5-Methoxytryptamine	89.7398	87.9533	97.0096	92.5804	99.9902	103.215
4785_A6_H11	SAM002548940	Fluvastatin	89.8856	92.2933	93.3356	92.5168	93.7425	70.673
4965_A3_H9	SAM002264642	DL-Penicillamine	90.111	98.1063	92.133	100.332	104.469	99.6998
5145_A8_H11_5205_A2_H4	SAM001246965	AM 404	90.1553	95.6456	86.9644	0.491853	25.2114	20.8306
5025_A7_H11_5085_A2_H3	SAM002264613	Fenofibrate	90.1631	100.334	96.9873	124.267	113.967	103.565
4725_A9_H11_4785_A2_H5	SAM001247050	Lobeline hydrochloride	90.2279	113.336	93.7068	72.786	87.8222	139.686
4965_A10_H11_5025_A2_H6	SAM001246791	Palonosetron hydrochloride	90.299	101.268	153.989	82.0587	94.4427	115.643
4965_A10_H11_5025_A2_H6	SAM001246625	Tiagabine hydrochloride	90.4198	100.352	114.404	93.0043	97.4912	135.958
5145_A8_H11_5205_A2_H4	SAM001247055	Ipidacrine	90.4669	96.3828	73.2288	79.5322	93.1321	119.527
5205_A5_C10	SAM001246582	Lamivudine	90.5064	92.8561	95.9738	96.9872	98.4307	110.25
4845_A2_H8	SAM002589991	Meloxicam	90.5986	102.986	107.436	95.4795	102.109	81.7391
4965_A10_H11_5025_A2_H6	SAM001246682	Methyltestosterone	90.6175	99.1224	102.732	100.522	100.669	114.948
4845_A9_H11_4905_A2_H5	SAM002564237	Triamcinolone acetonide	90.7848	98.4075	100.831	114.704	113.75	70.0971
4965_A10_H11_5025_A2_H6	SAM001246664	Voriconazole	90.8006	101.075	94.1661	99.5109	101.879	124.297
5205_A5_C10	SAM001247022	Chlorpheniramine maleate	90.878	95.0037	105.365	59.4395	82.2028	106.528
4845_A2_H8	SAM002554879	Dapsone	90.9403	99.6342	109.104	96.5772	96.4976	99.7429
5205_A5_C10	SAM001246967	Scopolamine hydrobromide	90.9921	93.4115	118.291	81.6776	94.2693	98.3143
4785_A6_H11	SAM002264611	Ethacrynic acid	91.0996	95.3029	106.999	54.4703	86.9543	86.1866
4965_A10_H11_5025_A2_H6	SAM001246623	Ezetimibe	91.1045	99.0137	71.1985	67.8894	73.8077	26.1877
5085_A4_H10	SAM002554914	Nalidixic acid	91.1563	101.737	103.198	55.5207	93.2908	77.5914
4965_A3_H9	SAM002264610	Propofol	91.1993	100.703	94.4546	95.3871	97.0043	111.298
5085_A11_H11_5145_A2_H7	SAM001247078	Remacemide hydrochloride	91.2571	100.517	103.922	61.4648	85.6709	147.615
4725_A9_H11_4785_A2_H5	SAM001247005	Felbamate	91.3437	109.916	88.8936	71.9623	91.9023	110.747
4845_A2_H8	SAM002700173	Fexofenadine hydrochloride	91.376	102.934	92.7033	106.285	98.2038	106.161
4965_A10_H11_5025_A2_H6	SAM001246577	Zafirlukast	91.4047	101.268	144.24	103.201	100.65	114.406
5085_A4_H10	SAM001246711	Nitrazepam	91.4855	95.4796	105.108	116.045	102.215	70.0826
4965_A10_H11_5025_A2_H6	SAM001246877	Benzbromarone	91.6647	98.0722	125.332	104.672	101.685	103.439
5025_A7_H11_5085_A2_H3	SAM002589936	Lincomycin hydrochloride	91.6726	101.554	100.066	117.464	111.629	114.32
5145_A8_H11_5205_A2_H4	SAM001246668	Escitalopram oxalate	91.6987	99.6858	83.9271	27.6661	70.7944	117.682
5145_A8_H11_5205_A2_H4	SAM001246558	Ticlopidine hydrochloride	91.8582	97.8358	84.7147	80.1058	100.782	61.9518
4965_A10_H11_5025_A2_H6	SAM001246732	Famciclovir	91.8661	98.4402	117.799	103.283	97.9858	84.8992
4725_A2_H8	SAM002264598	Bendrofluazide	91.9278	97.6385	123.516	106.501	103.793	118.794
5205_A5_C10	SAM001246680	Buflomedil hydrochloride	91.9524	96.5899	117.742	95.1082	100.513	102.923
4845_A9_H11_4905_A2_H5	SAM002589996	Mafenide acetate	92.0216	95.0082	101.815	112.181	112.408	81.4636
4905_A6_H11_4965_A2_H2	SAM001246963	Nifedipine	92.134	92.1762	96.6067	91.5094	94.1447	97.4051
5085_A4_H10	SAM002564193	Atenolol	92.1514	97.3986	135.853	113.344	101.589	83.552
5085_A4_H10	SAM002699890	Memantine hydrochloride	92.2637	98.0344	114.166	99.1779	100.495	77.949
4725_A9_H11_4785_A2_H5	SAM001246907	Pinacidil monohydrate	92.277	105.295	105.89	94.6114	97.737	112.562
4965_A10_H11_5025_A2_H6	SAM001246802	Olopatadine hydrochloride	92.4885	100.837	105.466	100.019	98.671	114.174
4905_A6_H11_4965_A2_H2	SAM002564238	S(-)-Timolol maleate	92.6797	94.1275	106.755	112.145	107.318	93.7883
4785_A6_H11	SAM001246763	Flumazenil	92.7059	102.312	102.298	104.591	101.888	94.1937
4725_A2_H8	SAM002554936	Tolbutamide	92.7541	98.9228	126.012	103.021	111.179	90.5057
4845_A9_H11_4905_A2_H5	SAM002564217	Labetalol hydrochloride	92.7698	96.1702	99.169	76.3599	93.0726	71.9468
4845_A2_H8	SAM002264603	Carbamazepine	92.7769	101.595	104.703	106.791	101.16	94.7365
4725_A2_H8	SAM001247097	SB 205607 dihydrobromide	92.7958	92.9444	120.236	4.84095	40.615	86.5074
4845_A9_H11_4905_A2_H5	SAM001247047	Tripelennamine hydrochloride	92.8172	97.5021	106.002	98.9892	92.4431	106.243
4965_A10_H11_5025_A2_H6	SAM001247074	Etomidate	92.862	100.557	103.175	113.788	103.793	103.439
4965_A10_H11_5025_A2_H6	SAM001246757	Ramipril	92.8656	99.4104	95.9387	102.894	99.5172	133.567
5025_A7_H11_5085_A2_H3	SAM001246731	Kitasamycin	92.8665	102.78	140.129	8.27805	68.7343	126.098
5025_A7_H11_5085_A2_H3	SAM002589969	Simvastatin	92.8985	101.356	84.808	104.804	112.302	105.889
5085_A4_H10	SAM002564213	Hydrocortisone hemisuccinate	93.0605	100.395	122.058	119.656	102.895	84.8607
5145_A8_H11_5205_A2_H4	SAM001246665	Fenoldopam mesylate	93.1233	100.678	97.8414	91.6255	102.582	99.6956
5025_A7_H11_5085_A2_H3	SAM002548974	Methoxsalen	93.2781	100.128	91.9014	102.037	111.273	96.1202
4725_A2_H8	SAM001246820	Lofexidine hydrochloride	93.4152	102.767	112.602	105.772	105.935	101.872
5145_A8_H11_5205_A2_H4	SAM001246604	Anagrelide hydrochloride	93.4498	97.7236	67.1541	93.0669	97.701	95.8493
5145_A8_H11_5205_A2_H4	SAM001246992	Physostigmine hemisulfate	93.5055	98.6734	83.8031	90.5045	96.5067	105.843
5085_A4_H10	SAM002554928	Procainamide hydrochloride	93.5767	98.8068	110.841	118.547	104.966	66.1494
4725_A9_H11_4785_A2_H5	SAM003107539	3,5,3'-Triiodothyronine	93.589	96.3942	131.259	121.916	110.759	96.4975
5085_A4_H10	SAM002264635	Prednisolone acetate	93.6254	98.7761	114.5	117.923	104.877	85.3399
5085_A4_H10	SAM002564191	Vidarabine	93.6778	100.185	103.113	113.698	101.513	66.5677
4725_A2_H8	SAM001246716	Secnidazole	93.6992	96.1727	128.554	103.99	110.521	110.459
5085_A4_H10	SAM002548969	Meclizine hydrochloride	93.7152	97.8967	129.038	62.8227	83.1753	48.8075
5145_A8_H11_5205_A2_H4	SAM001247001	Urapidil hydrochloride	93.7244	96.1607	101.247	90.6721	99.6685	97.694
5085_A4_H10	SAM002564250	Clobetasol propionate	93.7488	97.109	98.2975	127.245	104.817	89.2731
4965_A10_H11_5025_A2_H6	SAM001246759	Tocainide	93.814	99.0412	107.757	64.8473	65.9724	75.9351
5085_A4_H10	SAM001246685	Flubendazole	93.8723	99.8134	107.186	97.9093	96.923	25.9831
5145_A8_H11_5205_A2_H4	SAM001246565	Terbinafine hydrochloride	93.9247	99.8653	77.1194	15.1057	39.4676	15.6805
5025_A7_H11_5085_A2_H3	SAM002264650	Tetrahydrozoline hydrochloride	94.0603	100.45	101.583	120.659	111.378	118.021
4965_A10_H11_5025_A2_H6	SAM001246690	Honokiol	94.0849	99.3984	117.431	0.181395	23.0196	14.1367
5085_A4_H10	SAM002264600	Cortisone acetate	94.1005	101.278	89.239	118.6	102.307	60.3104
5205_A5_C10	SAM001246782	Alosetron monohydrochloride	94.2285	92.8262	101.524	78.5777	87.3591	97.7826
4845_A9_H11_4905_A2_H5	SAM001246677	Tacrolimus	94.2368	100.97	83.8098	11.9302	29.8896	20.578
5085_A4_H10	SAM002589905	Fluconazole	94.2576	102.501	109.096	110.533	101.698	77.3519
4845_A9_H11_4905_A2_H5	SAM001247018	Lidocaine	94.2853	100.818	87.0729	122.248	111.354	110.25
4905_A6_H11_4965_A2_H2	SAM001246980	Ifenprodil hemitartrate	94.3521	98.4998	108.19	8.32448	28.6745	92.5634
5025_A7_H11_5085_A2_H3	SAM002589948	Stavudine	94.3988	99.2947	96.0076	89.0238	107.385	128.816
4845_A9_H11_4905_A2_H5	SAM001247075	MK 886	94.4512	103.377	78.3934	0.171336	8.71308	10.4432
4965_A10_H11_5025_A2_H6	SAM001247090	L-694,247	94.4767	99.4247	99.9269	96.7838	98.7491	83.0452
5085_A11_H11_5145_A2_H7	SAM001246799	Artemether	94.5496	100.485	112.91	103.88	101.006	136.333
5025_A7_H11_5085_A2_H3	SAM002554882	Warfarin sodium	94.6962	97.7271	93.0177	99.1673	107.858	114.476
5085_A11_H11_5145_A2_H7	SAM001247089	HTMT dimaleate	94.7154	101.469	114.407	98.0162	99.6692	114.239
5085_A4_H10	SAM001246778	Taxifolin-(+)	94.7552	101.645	114.002	125.977	103.63	56.0196
4965_A10_H11_5025_A2_H6	SAM001246712	Benazepril hydrochloride	94.7989	99.2753	103.029	100.311	99.1479	118.577
5085_A4_H10	SAM002264612	Flutamide	94.8075	102.552	116.744	119.532	103.014	56.5559
5205_A5_C10	SAM001246576	Tropisetron hydrochloride	94.9545	91.4617	107.623	68.9804	80.3109	107.886
5145_A8_H11_5205_A2_H4	SAM001246983	Ketoconazole	95.0489	97.4708	113.644	0.0104117	6.36022	10.3768
4905_A6_H11_4965_A2_H2	SAM001247087	GR 89696 fumarate	95.065	96.1402	102.75	25.4016	53.8843	108.924
5085_A11_H11_5145_A2_H7	SAM001246587	Modafinil	95.1512	100.868	129.459	92.6862	99.9877	111.486
5145_A8_H11_5205_A2_H4	SAM001246684	Enalaprilat	95.342	96.1181	96.6892	88.456	97.5546	84.0151
5085_A11_H11_5145_A2_H7	SAM001246978	Galanthamine hydrobromide	95.3455	98.7384	91.7981	118.034	103.949	102.081
4725_A9_H11_4785_A2_H5	SAM001247010	Metronidazole	95.3676	111.389	94.6604	141.782	115.178	82.7502
4965_A10_H11_5025_A2_H6	SAM001246575	Levocetirizine	95.3811	98.5298	110.708	100.074	99.0154	124.76
5085_A4_H10	SAM001246999	SR 57227A	95.4959	99.9806	107.77	88.0348	97.8557	84.7427
5085_A4_H10	SAM001246882	Cortisone	95.4996	100.625	105.855	115.594	100.617	66.4462
5025_A7_H11_5085_A2_H3	SAM001246530	Sulfasalazine	95.547	100.082	108.053	109.979	112.897	108.765
5145_A8_H11_5205_A2_H4	SAM001246993	Picrotin - Picrotoxinin	95.572	97.6102	77.2397	83.3125	96.9799	105.304
5205_A5_C10	SAM001246747	Trimebutine maleate	95.6099	95.649	92.2568	28.1963	52.6949	90.7528
4845_A9_H11_4905_A2_H5	SAM002564222	19-Norethindrone acetate	95.6722	98.9855	106.094	17.5643	45.1159	54.1434
5085_A4_H10	SAM002564245	Thalidomide	95.6979	100.236	106.852	117.11	103.406	80.6915
5145_A8_H11_5205_A2_H4	SAM001246713	Mosapride citrate	95.7538	97.6113	76.2698	107.551	102.949	70.1794
4845_A2_H8	SAM002589935	Priscoline hydrochloride	95.8135	107.672	103.035	110.042	100.49	110.782
5085_A4_H10	SAM002554894	Dicyclomine hydrochloride	95.8138	101.324	133.858	0.132156	8.4989	48.332
5085_A11_H11_5145_A2_H7	SAM001246611	Milrinone	95.8334	99.8416	94.2246	86.0187	96.7017	113.501
4845_A9_H11_4905_A2_H5	SAM002564227	Pyridostigmine bromide	95.8697	103.704	95.7525	122.675	112.061	80.6543
4845_A2_H8	SAM002554906	Isoproterenol hydrochloride	95.9009	100.824	103.869	107.014	100.058	96.406
5085_A4_H10	SAM002264607	Disopyramide phosphate	96.0084	100.084	124.052	116.116	103.446	81.943
4725_A9_H11_4785_A2_H5	SAM001246801	Tibolone	96.0438	116.455	83.229	77.9819	108.619	16.3749
4965_A10_H11_5025_A2_H6	SAM001246681	Triclabendazole	96.0621	100.348	123.338	65.8478	85.4938	14.7546
5085_A4_H10	SAM002554911	Metoclopramide hydrochloride	96.2216	99.9229	116.993	117.318	102.707	82.8941
5085_A4_H10	SAM001246897	Prednisolone sodium succinate	96.2665	100.136	105.526	107.899	102.823	79.1397
4965_A10_H11_5025_A2_H6	SAM001246651	Topotecan hydrochloride	96.2964	97.3398	102.289	93.4341	95.6616	86.5956
4965_A3_H9	SAM001246599	Citalopram hydrobromide	96.2982	95.1591	105.688	1.42641	19.0935	114.875
5085_A4_H10	SAM001246756	Troxipide	96.3675	99.4743	99.5438	106.568	100.198	70.9765
4725_A2_H8	SAM001246857	Dehydrocholic acid	96.3867	93.3496	113.923	111.092	105.265	133.57
5085_A4_H10	SAM002554935	Theophylline	96.4161	99.6391	120.647	85.5994	97.5276	128.902
5085_A4_H10	SAM001246888	Resveratrol	96.4236	99.8511	83.0072	121.681	100.946	58.0434
5085_A11_H11_5145_A2_H7	SAM001246692	Carmofur	96.5156	97.263	138.446	73.7018	100.876	131.163
5145_A8_H11_5205_A2_H4	SAM001246670	Calcipotriol	96.6665	100.158	113.462	98.0912	103.722	72.716
4965_A10_H11_5025_A2_H6	SAM001247099	SDM25N hydrochloride	96.7688	102.769	112.702	0.193797	15.3369	20.394
5145_A8_H11_5205_A2_H4	SAM001247073	Clonidine hydrochloride	96.8705	99.8712	125.677	91.1786	98.0507	121.445
4965_A3_H9	SAM001246607	Ziprasidone	96.9967	99.4281	98.9829	103.55	106.177	80.1078
4725_A9_H11_4785_A2_H5	SAM002264619	Ibuprofen	97.0853	101.638	97.8672	95.8382	92.0128	158.372
4725_A9_H11_4785_A2_H5	SAM001247066	CGS 12066B dimaleate	97.2408	97.5301	97.5182	0.608401	7.16414	43.3757
4965_A10_H11_5025_A2_H6	SAM001246873	Ornidazole	97.2887	101.725	94.6846	102.572	100.4	84.3569
4845_A9_H11_4905_A2_H5	SAM002564229	Penicillin G potassium	97.304	99.422	100.892	74.8162	95.0919	103.276
5085_A4_H10	SAM002589925	Hydrocortisone 17-valerate	97.3289	101.672	96.5526	121.292	104.28	59.8312
5145_A8_H11_5205_A2_H4	SAM001247017	5-Fluoro-2-pyrimidone	97.4345	101.54	103.675	98.2216	99.0429	124.831
5085_A4_H10	SAM002589920	Carbinoxamine maleate	97.5609	100.822	93.4766	99.0364	100.06	71.3341
5085_A11_H11_5145_A2_H7	SAM001247106	GR 79236	97.5958	99.7849	95.2945	90.2608	99.0308	105.845
4785_A6_H11	SAM002589938	Azathioprine	97.8659	98.2981	93.5236	101.558	103.086	93.0748
4905_A6_H11_4965_A2_H2	SAM001246532	Diphenoxylate hydrochloride	97.8745	107.082	76.4668	71.255	94.056	70.4287
5085_A4_H10	SAM002554933	Sulindac	97.9499	99.9688	111.838	85.5994	98.7464	126.639
5085_A4_H10	SAM002548959	Mebendazole	97.9537	98.4441	54.8396	84.954	88.3773	31.7635
5145_A8_H11_5205_A2_H4	SAM001246717	Nifekalant hydrochloride	97.965	100.701	97.3564	88.3443	97.9406	105.765
5145_A8_H11_5205_A2_H4	SAM001246542	Itopride hydrochloride	98.0986	99.896	82.6509	92.0203	99.8536	80.0166
5145_A8_H11_5205_A2_H4	SAM001246643	Cefatrizine propylene glycol	98.1023	99.4601	93.8304	90.795	98.5916	97.3113
4845_A2_H8	SAM002700174	Fluorometholone	98.1505	106.515	103.775	107.487	101.106	96.406
5145_A8_H11_5205_A2_H4	SAM001246984	Ketotifen fumarate	98.1579	100.092	85.4439	51.9377	86.0669	170.488
5085_A4_H10	SAM001246841	Zolmitriptan	98.2604	101.239	105.776	88.2337	98.9699	133.847
5085_A4_H10	SAM002548951	Methimazole	98.2979	101.254	107.934	107.236	100.516	83.0729
5025_A7_H11_5085_A2_H3	SAM002589972	Quinapril hydrochloride	98.3373	101.798	108.008	118.607	112.22	118.376
4965_A10_H11_5025_A2_H6	SAM001246671	Latanoprost	98.4237	103.117	86.9297	68.3526	77.2798	44.3416
5085_A4_H10	SAM002699894	Mefloquine hydrochloride	98.4662	101.836	106.189	0.0173418	7.01655	11.6208
5025_A7_H11_5085_A2_H3	SAM001246988	LY 171883	98.5248	98.9541	104.038	104.39	110.838	120.78
5025_A7_H11_5085_A2_H3	SAM002589937	Mercaptopurine	98.5843	99.2922	88.1995	98.0805	107.424	116.093
5085_A4_H10	SAM002554913	Nitrofurantoin	98.6158	99.0104	94.7229	111.651	103.917	78.9609
4965_A10_H11_5025_A2_H6	SAM001246624	Linezolid	98.6178	100.704	122.451	55.3061	102.979	123.986
5145_A8_H11_5205_A2_H4	SAM001247077	Otenzepad	98.6514	101.565	76.3902	75.3347	94.9507	109.994
4965_A3_H9	SAM001246541	Finasteride	98.6519	105.383	84.4994	98.9679	104.577	84.826
4965_A10_H11_5025_A2_H6	SAM001246865	Brucine	98.691	101.624	103.472	112.431	101.267	94.4751
4725_A9_H11_4785_A2_H5	SAM001246833	Lorazepam	98.7421	101.273	143.845	154.781	109.456	88.6864
4965_A10_H11_5025_A2_H6	SAM001246603	Valdecoxib	98.7606	99.4677	132.497	106.344	99.3811	107.3
5025_A7_H11_5085_A2_H3	SAM002554898	Econazole nitrate	98.8176	102.411	105.151	12.3402	29.2109	15.3239
5085_A11_H11_5145_A2_H7	SAM001246653	Nefazodone hydrochloride	98.8938	103.297	129.532	4.01567	19.2031	74.4787
4965_A10_H11_5025_A2_H6	SAM001247057	Diclofenac sodium	98.9254	102.82	154.357	88.6357	97.4296	126.999
4965_A3_H9	SAM002564201	Captopril	98.9607	101.31	87.0526	111.515	105.003	109.315
5025_A7_H11_5085_A2_H3	SAM002264645	Ranitidine hydrochloride	99.0142	99.1489	79.0101	113.964	110.964	102.344
5145_A8_H11_5205_A2_H4	SAM001246583	Fluticasone propionate	99.1708	97.8571	122.636	89.4058	98.0785	123.29
5085_A4_H10	SAM001246889	11-Deoxycortisol	99.1957	100.739	104.444	109.623	98.8365	70.5582
5085_A11_H11_5145_A2_H7	SAM001246896	Synephrine	99.2254	98.5967	109.631	98.9345	99.0174	106.111
4965_A3_H9	SAM002554927	Pyrazinamide	99.2947	99.6218	87.2564	107.749	112.839	93.3897
5085_A11_H11_5145_A2_H7	SAM001246780	Vinorelbine tartrate	99.3012	102.52	97.2889	46.8816	88.7144	112.695
5085_A4_H10	SAM002548965	Metaproterenol	99.3191	99.8452	95.8845	116.376	101.248	80.0944
4905_A6_H11_4965_A2_H2	SAM001246561	Tegafur	99.3903	98.0937	87.7754	97.7009	97.48	107.524
4725_A9_H11_4785_A2_H5	SAM002589988	Ethambutol	99.3914	90.3558	137.125	94.4847	101.611	77.3128
4965_A10_H11_5025_A2_H6	SAM001246617	Rofecoxib	99.449	102.433	99.8515	115.222	102.183	93.7057
4965_A10_H11_5025_A2_H6	SAM001246641	Zaleplon	99.4709	101.872	129.249	97.3544	99.1965	90.1506
4965_A10_H11_5025_A2_H6	SAM001246874	Naproxen sodium	99.632	102.08	131.611	104.669	99.561	121.669
4905_A6_H11_4965_A2_H2	SAM001246870	Dichloroacetic acid	99.6331	92.2398	107.732	101.623	95.8303	103.5
5025_A7_H11_5085_A2_H3	SAM002699891	Racepinephrine	99.7141	101.224	109.078	96.4902	105.78	99.2708
4965_A10_H11_5025_A2_H6	SAM001246638	Alfuzosin	99.7345	101.706	81.6121	120.353	101.754	115.49
5085_A11_H11_5145_A2_H7	SAM001246858	Benzylimidazole	99.7371	101.405	111.557	86.5377	97.6108	121.089
4965_A10_H11_5025_A2_H6	SAM001246891	Mepirizole	99.8005	98.8703	97.4143	102.294	101.244	131.323
5085_A11_H11_5145_A2_H7	SAM001246746	Mestanolone	99.865	99.5335	102.57	122.296	105.488	142.849
4965_A10_H11_5025_A2_H6	SAM001246884	Cefaclor	100.046	104.696	80.0612	71.8467	92.4179	105.446
4965_A3_H9	SAM001246596	Ketorolac tromethamine	100.078	104.142	103.454	122.901	115.154	89.1529
4845_A2_H8	SAM002264620	Ketoprofen	100.121	104.895	99.0493	114.349	98.5253	87.7411
5145_A8_H11_5205_A2_H4	SAM001246619	Rabeprazole	100.124	99.9327	97.2361	104.963	100.52	70.3316
5145_A8_H11_5205_A2_H4	SAM001246593	Ozagrel hydrochloride	100.154	100.847	107.748	97.0819	97.7107	118.374
4845_A9_H11_4905_A2_H5	SAM002264616	Folic acid	100.17	99.226	99.1376	103.194	104.053	91.1746
5085_A4_H10	SAM002564206	Estradiol valerate	100.209	99.9782	76.5262	0.0641973	16.9089	8.87939
4905_A6_H11_4965_A2_H2	SAM001246972	(+/-)-Vesamicol hydrochloride	100.278	104.13	99.0529	96.6875	97.0388	108.632
4725_A2_H8	SAM002589927	Nafcillin sodium	100.342	95.9513	99.9765	115.952	105.158	110.712
4905_A6_H11_4965_A2_H2	SAM001247006	Pramipexole	100.431	96.5177	99.9697	110.073	106.328	99.7673
4965_A10_H11_5025_A2_H6	SAM001246636	Temozolomide	100.514	102.426	80.429	109.675	101.876	138.665
5145_A8_H11_5205_A2_H4	SAM001246892	Rolitetracycline	100.558	100.268	105.258	106.114	102.856	100.078
4965_A10_H11_5025_A2_H6	SAM001247105	Sibutramine	100.584	100.766	93.1336	6.36616	32.8714	58.6327
4965_A3_H9	SAM002589950	Dexamethasone sodium phosphate	100.626	106.239	94.5713	121.025	127.247	81.2797
5085_A4_H10	SAM002564211	Gemfibrozil	100.64	102.492	120.896	112.447	103.038	92.2516
4845_A2_H8	SAM002564202	Chlorambucil	100.669	106.286	103.822	88.6555	90.1358	106.193
4965_A3_H9	SAM002554938	Dopamine hydrochloride	100.68	107.063	88.998	135.722	131.443	82.3019
5025_A7_H11_5085_A2_H3	SAM002554892	Cimetidine	100.688	100.004	109.3	98.6638	107.974	104.234
5085_A11_H11_5145_A2_H7	SAM001246730	Gabexate mesilate	100.718	98.6546	93.6512	88.2396	95.4715	105.442
4725_A9_H11_4785_A2_H5	SAM002554916	Naphazoline hydrochloride	100.73	108.894	105.49	125.324	100.769	105.749
5145_A8_H11_5205_A2_H4	SAM001246588	Indinavir sulfate	100.736	94.8742	82.3446	107.924	100.668	100.461
5085_A11_H11_5145_A2_H7	SAM001246962	Pilocarpine hydrochloride	100.931	101.668	110.273	94.8522	99.0995	108.799
4845_A9_H11_4905_A2_H5	SAM001246602	Telmisartan	100.969	100.883	79.5014	76.4611	96.7901	80
5085_A4_H10	SAM002554908	Mefenamic acid	101.074	101.669	110.761	119.532	104.252	76.8763
5145_A8_H11_5205_A2_H4	SAM001247092	Nafadotride	101.089	101.135	74.9316	62.6418	88.2401	102.002
5145_A8_H11_5205_A2_H4	SAM001247035	Milnacipran hydrochloride	101.271	100.404	97.2944	97.3202	100.036	110.072
5205_A5_C10	SAM001246635	Losartan potassium	101.404	92.3287	95.3665	96.4957	100.191	107.886
4845_A2_H8	SAM002589964	Aminoglutethimide	101.409	102.126	109.937	88.3353	91.8555	98.1698
5085_A4_H10	SAM002554891	Chlorothiazide	101.459	101.847	87.3296	113.066	102.083	63.2281
5145_A8_H11_5205_A2_H4	SAM001246768	Doxorubicin hydrochloride	101.467	96.3001	104.529	2.39472	43.2948	18.6782
5085_A4_H10	SAM002554912	Methyldopa	101.575	100.726	115.662	126.061	103.131	65.2555
4845_A9_H11_4905_A2_H5	SAM001247014	D-Cycloserine	101.725	102.013	93.1671	118.381	110.47	93.9121
4785_A6_H11	SAM001246687	Mecillinam	101.778	104.831	105.243	108.026	103.433	97.3858
5145_A8_H11_5205_A2_H4	SAM001246995	Prazosin hydrochloride hydrate	101.783	97.231	80.6454	0.0423546	17.1299	9.9156
5085_A4_H10	SAM001246921	Testosterone	101.904	101.16	90.0715	119.647	103.338	76.9943
4905_A6_H11_4965_A2_H2	SAM001246648	Lacidipine	101.954	99.6675	71.9136	0.0659582	6.44104	17.2061
4785_A6_H11	SAM002703129	Carbidopa	101.99	96.3396	93.9599	107.646	111.913	85.4575
5145_A8_H11_5205_A2_H4	SAM001246996	Amiloride hydrochloride hydrate	102.128	100.083	89.3965	88.6497	96.5128	108.071
4845_A9_H11_4905_A2_H5	SAM002264614	Furosemide	102.296	104.276	88.397	108.969	103.191	102.966
5085_A4_H10	SAM002548955	Isotretinoin	102.304	101.358	91.7317	105.87	99.6791	78.8429
5085_A11_H11_5145_A2_H7	SAM001247088	P1075	102.352	102.669	100.43	75.1691	94.8087	88.0463
5085_A11_H11_5145_A2_H7	SAM001247084	Betaxolol hydrochloride	102.366	99.1218	108.989	102.977	101.236	119.408
5145_A8_H11_5205_A2_H4	SAM001246538	Esomeprazole magnesium	102.376	100.082	85.9325	107.905	102.282	76.0181
5085_A4_H10	SAM001246678	Secoisolariciresinol	102.435	100.642	81.8456	91.8184	99.0457	143.802
4965_A3_H9	SAM001246586	Tadalafil	102.544	104.778	105.195	91.9696	97.097	92.3675
5085_A11_H11_5145_A2_H7	SAM001246887	Oxyphenonium bromide	102.57	101.835	108.202	110.658	103.741	118.603
5145_A8_H11_5205_A2_H4	SAM001246987	Loratadine	102.688	103.275	108.904	0.100318	12.3964	11.991
4905_A6_H11_4965_A2_H2	SAM001246854	6-Aminoindazole	102.743	100.486	103.331	104.152	99.8753	100.933
4725_A9_H11_4785_A2_H5	SAM001246760	Taxifolin-(+/-)	102.813	107.659	101.077	106.436	101.875	131.747
4785_A6_H11	SAM002264640	Prilocaine hydrochloride	103.193	100.885	83.4932	95.7969	97.793	107.298
4965_A3_H9	SAM001246895	alpha-Methyl-L-tyrosine	103.209	109.526	105.601	94.1043	102.981	97.055
4905_A6_H11_4965_A2_H2	SAM002564232	Proxymetacaine	103.324	105.03	95.2314	101.028	96.2092	105.249
5085_A4_H10	SAM002548958	Brimonidine	103.329	100.307	120.812	79.6499	93.2956	113.823
4965_A3_H9	SAM001246788	Zanamivir hydrate	103.386	101.938	103.309	99.7358	106.34	89.8146
4785_A6_H11	SAM002554899	Ethionamide	103.396	99.885	102.798	100.661	104.089	107.13
5085_A4_H10	SAM001246549	Zolpidem tartrate	103.453	100.864	102.535	87.111	99.4327	143.265
4845_A2_H8	SAM002589949	Minoxidil	103.578	109.38	105.398	105.759	97.0843	104.428
4725_A9_H11_4785_A2_H5	SAM001246528	Rutin	103.618	96.6722	118.925	87.2137	88.5057	148.686
5085_A11_H11_5145_A2_H7	SAM001247026	Nornicotine	103.631	100.274	102.925	113.003	104.156	107.924
4785_A6_H11	SAM002264651	L-Thyroxine	103.703	103.683	102.11	98.0387	99.7611	106.179
4965_A10_H11_5025_A2_H6	SAM001246723	Bupropion hydrochloride	103.784	102.908	162.409	97.1284	100.059	102.818
5145_A8_H11_5205_A2_H4	SAM001246764	Moxonidine hydrochloride	103.857	101.716	96.6272	90.8062	100.76	86.7823
4845_A9_H11_4905_A2_H5	SAM002564219	Midodrine hydrochloride	103.865	106.16	100.984	141.396	121.487	77.2647
5145_A8_H11_5205_A2_H4	SAM001246886	2-Chloroadenosine	104.035	101.361	86.9644	136.137	108.553	51.884
5145_A8_H11_5205_A2_H4	SAM001247002	Tacrine hydrochloride	104.113	100.104	76.5105	84.2995	97.9043	79.477
5145_A8_H11_5205_A2_H4	SAM001246547	Roxatidine acetate hydrochloride	104.209	101.843	84.7147	96.2997	100.499	127.289
4785_A6_H11	SAM002264639	Prednisolone	104.283	99.6017	93.7117	104.753	104.85	94.308
4905_A6_H11_4965_A2_H2	SAM002554924	Pralidoxime chloride	104.31	101.081	97.0651	113.86	106.788	98.105
5085_A4_H10	SAM002554910	Mepenzolate bromide	104.426	102.026	107.022	118.595	102.394	78.4854
4785_A6_H11	SAM001246526	Cladribine	104.449	96.7995	63.6241	98.6629	94.402	52.9216
4845_A9_H11_4905_A2_H5	SAM001246647	Actarit	104.619	109.961	98.3066	101.337	100.587	108.132
4905_A6_H11_4965_A2_H2	SAM001247080	Altanserin hydrochloride	104.673	101.024	98.0443	0.511642	6.82204	84.1067
4905_A6_H11_4965_A2_H2	SAM001246885	Desoximetasone	104.725	107.348	92.0535	95.7281	100.209	96.4707
5025_A7_H11_5085_A2_H3	SAM002589982	Terazosin	104.732	99.1552	100.735	113.677	109.723	95.5671
4965_A10_H11_5025_A2_H6	SAM001246595	Risperidone	104.762	102.144	128.877	116.689	99.1184	135.727
4845_A9_H11_4905_A2_H5	SAM002554900	Methocarbamol	104.847	108.605	86.2105	116.143	117.816	67.6301
4785_A6_H11	SAM001246616	Halometasone monohydrate	105.115	104.555	94.2119	99.1399	101.057	93.4108
4845_A9_H11_4905_A2_H5	SAM001247011	Pentoxifylline	105.382	104.454	79.1634	109.805	100.661	102.197
4845_A9_H11_4905_A2_H5	SAM002564241	Altretamine	105.422	109.462	91.5974	126.521	117.694	69.8266
4785_A6_H11	SAM002564258	Medrysone	105.469	100.425	79.5442	96.2592	96.6493	77.0572
4725_A9_H11_4785_A2_H5	SAM001247065	CCPA	105.613	104.424	112.207	91.1669	95.3135	161.559
5145_A8_H11_5205_A2_H4	SAM001246527	Granisetron hydrochloride	105.686	100.89	79.0629	111.19	102.207	80.7084
5025_A7_H11_5085_A2_H3	SAM001246721	Nateglinide	105.706	102.842	114.745	103.105	111.293	105.575
4845_A9_H11_4905_A2_H5	SAM002548956	Fludarabine	105.943	100.673	95.2909	91.5867	94.6526	111.716
5085_A11_H11_5145_A2_H7	SAM001246710	Glimepiride	106.123	101.03	114.407	97.1179	100.352	81.196
4965_A10_H11_5025_A2_H6	SAM001246548	Irbesartan	106.149	103.623	121.419	95.75	99.6272	97.7984
5085_A11_H11_5145_A2_H7	SAM001246922	Dehydroepiandrosterone	106.199	104.294	94.9351	103.87	102.214	148.961
4785_A6_H11	SAM001247008	Ethynylestradiol	106.384	101.164	87.3181	94.3514	107.494	61.7688
4845_A2_H8	SAM002703135	Dantrolene sodium	106.47	111.367	99.6053	119.345	105.856	82.0915
5085_A4_H10	SAM002564212	Glyburide	106.483	99.2836	92.2302	105.804	97.8834	74.7309
5085_A11_H11_5145_A2_H7	SAM001247101	DuP 697	106.488	102.344	121.969	106.525	104.421	112.76
4725_A2_H8	SAM002264609	Dipyridamole	106.558	102.175	114.804	52.9978	70.6431	71.2265
4965_A10_H11_5025_A2_H6	SAM001246621	Dofetilide	106.563	103.006	138.48	105.406	101.163	90.9988
4725_A9_H11_4785_A2_H5	SAM001246880	Etoposide	106.668	98.1014	122.736	88.8594	100.315	96.8725
4725_A2_H8	SAM001246842	Dolasetron mesylate	106.67	98.6416	105.212	125.779	102.399	127.215
5145_A8_H11_5205_A2_H4	SAM001246719	Nisoldipine	106.877	100.501	117.896	80.0648	98.738	43.1213
4845_A2_H8	SAM002589930	Oxacillin sodium	106.883	106.961	108.917	100.486	101.502	107.541
5085_A11_H11_5145_A2_H7	SAM001246740	Phenprobamate	106.957	98.7557	115.049	102.663	99.0664	108.73
5205_A5_C10	SAM001246610	Rosiglitazone maleate	106.958	102.525	101.279	93.4512	100.233	104.873
4965_A3_H9	SAM001246615	Rizatriptan benzoate	107.171	109.851	106.327	91.8678	98.9705	106.971
4725_A9_H11_4785_A2_H5	SAM001246658	Naftopidil	107.378	109.342	117.824	1.34731	21.5216	43.312
4905_A6_H11_4965_A2_H2	SAM001246584	Isradipine	107.413	104.878	104.156	34.4714	64.0699	59.4348
4785_A6_H11	SAM002554929	Sulfisoxazole	107.487	97.6822	100.481	109.481	105.406	115.141
5025_A7_H11_5085_A2_H3	SAM002264623	Miconazole nitrate	107.577	106.464	115.725	0.295592	15.4347	8.39075
5145_A8_H11_5205_A2_H4	SAM001246851	Huperzine A	107.752	101.032	76.8751	110.922	103.229	98.0814
4905_A6_H11_4965_A2_H2	SAM001247020	Mesalamine	107.796	102.699	88.0505	97.593	101.043	95.9458
4965_A3_H9	SAM002564257	Phylloquinone	107.866	114.745	87.8364	107.31	108.96	86.2989
5085_A11_H11_5145_A2_H7	SAM001247108	MDL 73005EF hydrochloride	107.928	105.122	110.128	103.9	102.703	151.581
5085_A4_H10	SAM002264648	Spironolactone	107.946	102.274	82.2594	90.93	97.988	123.656
4845_A9_H11_4905_A2_H5	SAM001247076	Linopirdine dihydrochloride	107.966	104.347	94.5522	107.582	105.322	96.1087
4845_A9_H11_4905_A2_H5	SAM001246614	Moclobemide	108.235	107.714	85.5346	128.331	110.527	101.387
5145_A8_H11_5205_A2_H4	SAM001246675	Formoterol fumarate dihydrate	108.361	104.748	103.435	98.311	100.997	104.538
4965_A3_H9	SAM001246539	Levetiracetam	108.684	104.964	99.7666	104.001	104.713	85.457
4845_A2_H8	SAM002264631	Pindolol	108.695	115.48	88.6727	92.4851	98.2758	86.0081
5025_A7_H11_5085_A2_H3	SAM001247095	Ru 24969 hemisuccinate	108.977	102.61	105.866	133.296	116.088	104.667
5145_A8_H11_5205_A2_H4	SAM001246573	Vardenafil citrate	108.98	100.443	102.946	91.7112	100.465	70.0226
4845_A2_H8	SAM002703137	Naloxone hydrochloride	109.121	114.714	91.1272	118.153	108.52	85.5575
4965_A10_H11_5025_A2_H6	SAM001247025	Etomoxir	109.221	103.365	105.834	111.705	100.944	101.817
4785_A6_H11	SAM002699893	Methylprednisolone acetate	109.235	105.953	93.0197	106.738	103.11	101.475
5085_A11_H11_5145_A2_H7	SAM001247072	Raclopride	109.245	101.645	113.551	89.9014	97.8546	113.098
4845_A9_H11_4905_A2_H5	SAM002554896	Diflunisal	109.248	100.792	91.5051	131.501	121.598	76.3399
4965_A3_H9	SAM001246912	Xanthinol nicotinate	109.433	112.322	82.2056	108.954	111.141	99.2797
5085_A11_H11_5145_A2_H7	SAM001247098	R(+)-SCH-23390 hydrochloride	109.539	101.329	121.328	114.076	102.301	141.37
4905_A6_H11_4965_A2_H2	SAM002554888	Chlorzoxazone	109.725	105.954	100.58	120.729	111.77	97.2581
4905_A6_H11_4965_A2_H2	SAM001247037	Phenelzine sulfate	109.805	101.028	101.864	111.602	102.59	96.8504
4845_A2_H8	SAM002548931	Bethanechol chloride	109.866	118.687	89.7373	96.6363	96.5718	104.268
4785_A6_H11	SAM002589943	Methazolamide	109.9	105.719	102.422	106.556	100.968	97.3321
5025_A7_H11_5085_A2_H3	SAM002264632	Praziquantel	110.143	103.623	112.513	121.529	113.892	110.42
4725_A9_H11_4785_A2_H5	SAM001246770	Oxaprozin	110.158	104.319	110.002	115.585	108.248	133.435
4965_A3_H9	SAM001246767	Isoquercitrin	110.159	101.564	102.525	26.3448	60.5118	110.788
4845_A2_H8	SAM002554885	Atropine	110.253	107.342	101.598	84.9861	85.7162	98.01
4845_A9_H11_4905_A2_H5	SAM002548948	Dexamethasone	110.272	112.334	89.904	117.065	112.458	88.0532
4965_A3_H9	SAM001246961	Flurbiprofen	110.441	110.165	89.8985	123.632	111.149	94.0207
5085_A11_H11_5145_A2_H7	SAM001246544	Lansoprazole	110.463	100.819	90.4414	134.223	103.472	70.2476
4785_A6_H11	SAM001246525	Anastrozole	110.806	103.373	95.5922	100.756	97.9388	102.876
5085_A11_H11_5145_A2_H7	SAM001246581	Valsartan	110.903	101.067	102.57	80.9632	95.9874	97.3143
5145_A8_H11_5205_A2_H4	SAM001246969	Selegiline hydrochloride	111.028	105.22	86.0529	105.186	104.398	97.694
4785_A6_H11	SAM002564239	Thiabendazole	111.118	100.351	88.0063	103.772	100.376	97.5538
5145_A8_H11_5205_A2_H4	SAM001246572	Venlafaxine hydrochloride	111.128	103.252	98.6946	98.3519	101.803	110.225
5085_A11_H11_5145_A2_H7	SAM001246761	Cephalexin hydrate	111.202	98.9036	105.634	90.5203	97.8228	107.791
4725_A2_H8	SAM001246806	Bestatin	111.61	100.544	111.037	180.307	118.998	103.347
4965_A10_H11_5025_A2_H6	SAM001246605	Pterostilbene	111.905	105.154	143.279	73.1659	77.9769	51.8331
4785_A6_H11	SAM002264641	Prednisone	111.95	101.805	93.5838	104.46	104.108	97.6681
4785_A6_H11	SAM001246689	Docetaxel	112.085	107.37	92.8956	109.465	105.909	89.6038
5085_A11_H11_5145_A2_H7	SAM001246720	Piceid	112.272	100.939	100.499	90.8047	98.2516	93.9576
4785_A6_H11	SAM002548961	Tizanidine hydrochloride	112.46	107.444	90.5149	121.314	101.566	69.3861
5085_A11_H11_5145_A2_H7	SAM001247023	Dextrorphan D-tartrate	112.585	104.487	108.989	87.476	94.8283	85.2941
4785_A6_H11	SAM002589984	Methylprednisolone	112.741	101.497	74.0908	97.591	97.1566	84.6175
4725_A9_H11_4785_A2_H5	SAM002564207	Edrophonium chloride	112.768	98.4625	111.606	86.1734	104.091	81.4977
5085_A11_H11_5145_A2_H7	SAM001246701	Nicorandil	112.784	102.344	100.499	140.746	107.399	115.85
4965_A3_H9	SAM001246560	Icariin	112.808	101.095	98.4604	141.327	111.568	91.4372
4785_A6_H11	SAM001247030	Doxylamine succinate	112.876	112.313	88.0063	103.879	98.5138	104.667
5085_A11_H11_5145_A2_H7	SAM001246632	Lofepramine	113.03	103.823	126.322	56.2895	91.9514	130.828
4905_A6_H11_4965_A2_H2	SAM001246852	Tremulacin	113.227	103.684	96.3023	112.487	105.301	97.5801
4785_A6_H11	SAM001246702	Crotamiton	113.646	108.08	91.4551	103.06	102.268	114.747
4845_A9_H11_4905_A2_H5	SAM001246893	Pirenperone	113.842	108.434	91.5365	83.0552	85.6597	116.261
4785_A6_H11	SAM002564215	Ipratropium bromide	113.927	107.306	102.55	104.161	98.7675	87.9238
4785_A6_H11	SAM001246792	Doxapram hydrochloride	114.884	112.006	95.2161	99.8946	104.96	101.364
4845_A9_H11_4905_A2_H5	SAM001246982	Indomethacin hydrate	115.117	109.121	102.923	135.639	121.546	77.8035
4785_A6_H11	SAM002548957	Zonisamide	115.425	107.251	96.5926	101.646	102.359	103.548
4845_A2_H8	SAM002589967	Acyclovir	115.45	117.867	86.4017	115.849	103.586	97.1762
5145_A8_H11_5205_A2_H4	SAM001246655	Nelfinavir mesylate	115.473	103.473	57.4294	1.20006	31.9366	16.2953
4905_A6_H11_4965_A2_H2	SAM001246773	Parecoxib sodium	116.056	103.052	101.162	103.262	103.354	93.7883
5085_A11_H11_5145_A2_H7	SAM001246650	Meropenem	116.294	104.111	107.491	76.0424	99.9081	128.544
4845_A2_H8	SAM001246733	Acarbose	116.608	115.77	90.2015	132.163	122.723	86.424
4725_A9_H11_4785_A2_H5	SAM001246879	Corticosterone	116.744	108.996	98.6704	106.371	108.252	102.31
4905_A6_H11_4965_A2_H2	SAM002589945	Fluocinolone acetonide 21-acetate	116.791	113.491	96.0272	90.0888	101.959	92.2712
5085_A11_H11_5145_A2_H7	SAM001246637	Orlistat	116.801	106.62	92.0121	104.12	103.746	68.5713
4785_A6_H11	SAM001247015	Deferiprone	116.819	112.182	105.183	109.054	108.361	120.739
4905_A6_H11_4965_A2_H2	SAM001246862	Tryptoline	117.102	108.577	95.7522	51.8892	86.9443	88.0437
4845_A2_H8	SAM002554901	Hydrochlorothiazide	117.123	109.062	95.5747	101.268	96.8595	103.401
4845_A2_H8	SAM002589989	Cetirizine	117.185	109.03	106.602	102.818	95.6748	105.36
4965_A3_H9	SAM002589986	Naltrexone hydrochloride	117.377	110.79	96.9521	108.996	113.454	94.1109
4905_A6_H11_4965_A2_H2	SAM002564236	Tolazamide	117.461	111.43	96.79	101.511	102.743	95.3333
4965_A3_H9	SAM001246591	Pantoprazole sodium	117.669	115.96	96.2259	120.518	110.322	99.0688
4965_A3_H9	SAM002589934	Cromolyn sodium	118.182	119.19	97.7933	77.545	95.2064	101.714
4785_A6_H11	SAM001246531	Nitrendipine	118.296	107.085	84.1213	74.1212	109.82	71.7953
4785_A6_H11	SAM001246700	Idebenone	118.327	112.948	100.229	30.4617	50.9883	18.3687
4845_A2_H8	SAM002264644	Quinidine	118.906	123.301	83.3912	2.61593	34.4101	100.095
4965_A3_H9	SAM001246683	Natamycin	118.921	111.963	96.5167	120.826	119.245	92.6685
4785_A6_H11	SAM002589919	Aminolevulinic acid	118.951	110.733	91.8312	93.6957	96.3977	91.1697
4965_A3_H9	SAM001246601	Topiramate	119.319	115.719	95.268	87.1375	96.3017	103.816
5085_A11_H11_5145_A2_H7	SAM001247063	Nalbuphine hydrochloride	119.345	104.545	122.111	107.828	101.28	121.492
4845_A9_H11_4905_A2_H5	SAM001247067	PD 81723	119.394	112.831	80.7627	168.211	132.022	59.9607
4905_A6_H11_4965_A2_H2	SAM001246696	Alprazolam	119.426	106.889	105.165	89.3623	89.7856	110.906
4905_A6_H11_4965_A2_H2	SAM002564214	Indapamide	119.449	108.774	92.0535	123.757	117.585	84.5144
4965_A3_H9	SAM001246642	Fenpiverinium bromide	119.862	119.341	87.286	93.0998	98.0801	90.5646
5205_A5_C10	SAM001246598	Irinotecan hydrochloride	120.52	102.104	101.89	99.5719	89.0569	83.0707
4845_A2_H8	SAM001246708	Nitazoxanide	120.787	121.316	79.0827	144.202	105.418	66.1095
4905_A6_H11_4965_A2_H2	SAM001247091	E-4031 dihydrochloride	121.035	116.167	92.1764	131.102	124.423	91.7463
4905_A6_H11_4965_A2_H2	SAM001246900	Omeprazole	121.601	108.056	86.919	113.942	108.092	96.7332
4845_A2_H8	SAM001246860	Nicotinamide	121.909	119.068	87.9778	121.03	109.887	97.465
4965_A3_H9	SAM001246754	Oxcarbazepine	121.926	112.712	106.559	120.057	116.354	102.283
4905_A6_H11_4965_A2_H2	SAM001247102	Methylperone hydrochloride	122.029	114.224	91.7784	108.74	105.071	95.7708
4785_A6_H11	SAM001247048	Piroxicam	122.093	107.43	105.431	103.542	108.217	118.165
4965_A3_H9	SAM001246986	N-Fmoc-D-leucine	122.272	118.219	88.6497	135.101	129.899	79.5075
4905_A6_H11_4965_A2_H2	SAM001246906	Medroxyprogesterone	122.306	104.659	89.9447	55.1484	81.7197	98.105
4905_A6_H11_4965_A2_H2	SAM001246551	Nevirapine	122.367	114.007	95.8127	111.833	111.43	95.5083
4905_A6_H11_4965_A2_H2	SAM001246872	Diazoxide	122.511	110.587	88.6923	109.876	113.461	93.993
4905_A6_H11_4965_A2_H2	SAM001246796	Raltitrexed	122.595	108.041	97.2191	117.756	107.476	95.1006
4785_A6_H11	SAM001246745	Miglitol	122.634	102.418	87.4422	108.821	112.075	95.5378
4965_A3_H9	SAM001247085	Cilostazol	123.262	116.687	95.355	129.901	113.393	102.044
4785_A6_H11	SAM001246612	Bicalutamide	123.269	116.659	83.3691	134.137	118.686	117.829
4845_A9_H11_4905_A2_H5	SAM001246661	Argatroban	123.965	105.052	89.7193	101.584	96.2493	112.832
4905_A6_H11_4965_A2_H2	SAM001246669	Amlexanox	124.395	112.523	91.8701	125.169	116.24	100.758
4785_A6_H11	SAM001247060	Racecadotril	125.089	116.364	110.196	113.519	102.742	97.947
4965_A3_H9	SAM002589940	Griseofulvin	125.599	115.117	101.655	125.459	115.364	87.8314
4905_A6_H11_4965_A2_H2	SAM001246751	19-Nortestosterone	125.904	111.97	93.9184	70.0766	86.5199	108.954
5085_A11_H11_5145_A2_H7	SAM002699898	Budesonide	125.916	104.187	108.416	101.38	100.757	110.277
5085_A11_H11_5145_A2_H7	SAM001246913	Tinidazole	127.119	106.755	117.831	109.49	101.491	131.094
4905_A6_H11_4965_A2_H2	SAM001246574	Exemestane	127.819	112.258	92.2974	94.0113	113.643	69.6115
5085_A11_H11_5145_A2_H7	SAM001246985	Methotrexate trihydrate	128.299	105.918	111.343	70.1585	95.4348	145.266
5085_A11_H11_5145_A2_H7	SAM001246564	Procarbazine hydrochloride	129.81	103.565	114.981	95.8453	100.847	116.789
4845_A2_H8	SAM002554903	Hexachlorophene	129.987	123.527	79.6859	127.811	99.8269	58.4729
4905_A6_H11_4965_A2_H2	SAM001246762	Pidotimod	130.233	117.916	92.2974	110.223	109.217	94.343
4965_A3_H9	SAM002297828	L-Carnitine inner salt	130.237	122.425	86.7635	143.465	136.678	71.755
4905_A6_H11_4965_A2_H2	SAM001246868	Benactyzine hydrochloride	130.909	113.535	94.3457	89.7756	99.3118	98.8329
4905_A6_H11_4965_A2_H2	SAM002589968	Etodolac	132.528	112.014	95.1103	128.065	114.029	88.3342
4785_A6_H11	SAM001247069	Zacopride hydrochloride hydrate	136.398	111.034	75.9713	113.822	105.634	109.65
4965_A3_H9	SAM002554925	Primidone	140.585	125.971	87.3435	91.9022	111.314	78.1246
4965_A3_H9	SAM002643510	Erythromycin	140.879	130.777	91.2622	78.1558	97.2458	103.455
4905_A6_H11_4965_A2_H2	SAM001247082	Azasetron hydrochloride	145.806	121.496	93.8872	155.976	126.051	87.6938
4965_A3_H9	SAM001246890	Nimodipine	145.865	117.004	87.0247	66.4376	87.7318	78.6655
4905_A6_H11_4965_A2_H2	SAM001246585	Midazolam hydrochloride	147.373	119.729	85.2375	135.743	122.03	76.2607
4845_A2_H8	SAM002264597	Buspirone hydrochloride	155.144	140.724	77.8318	150.644	116.084	88.2224
